# Supplementary material for: New Autoantibody Specificities in Systemic Sclerosis and Very Early Systemic Sclerosis
Source: Antibodies (Basel). 2021 Mar 28;10(2):12. doi: 10.3390/antib10020012 (PMC8103273; doi:10.3390/antib10020012)
Supplement: Supplementary file 1 [file antibodies-10-00012-s001.pdf]

*SUPPLEMENTARY FIGURES*

**New Autoantibody Specificities in Systemic Sclerosis and Very Early Systemic Sclerosis**

Roberto Lande, Raffaella Palazzo, Anna Mennella, Immacolata Pietraforte, Marius Cadar, Katia Stefanantoni, Curdin Conrad,  
Valeria Riccieri <sup>4</sup> and Loredana Frasca

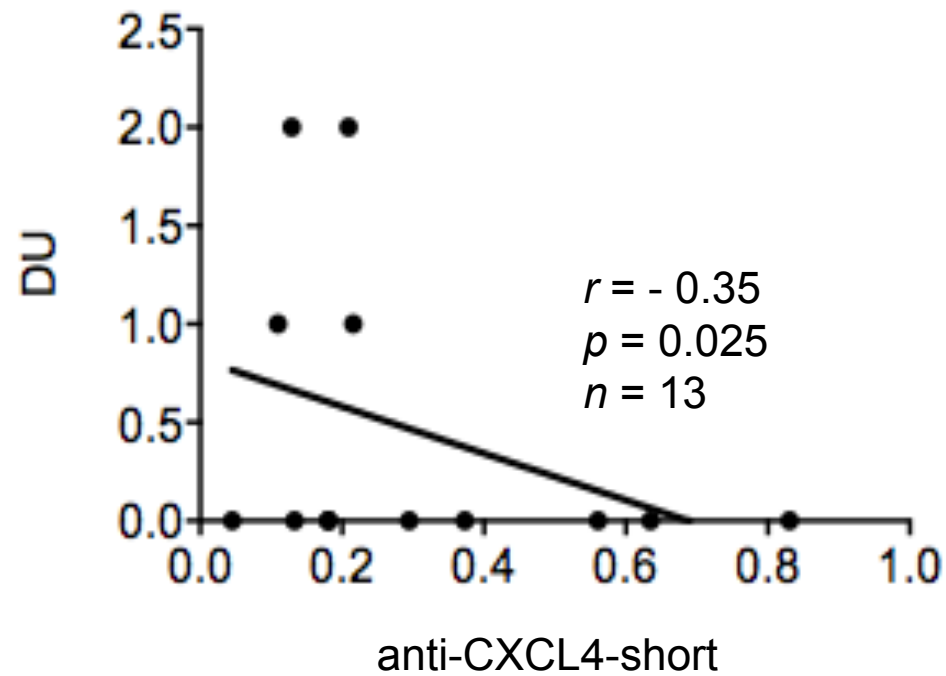

**Figure S1. In eaSSc there is a negative correlation between anti-CXCL4 antibodies and DU.** Number of DU in eaSSc plotted against anti-CXCL4 antibodies directed to the COOH-term of CXCL4.  $r$  Spearman coefficient,  $p$  values and sample size  $n$  indicated.

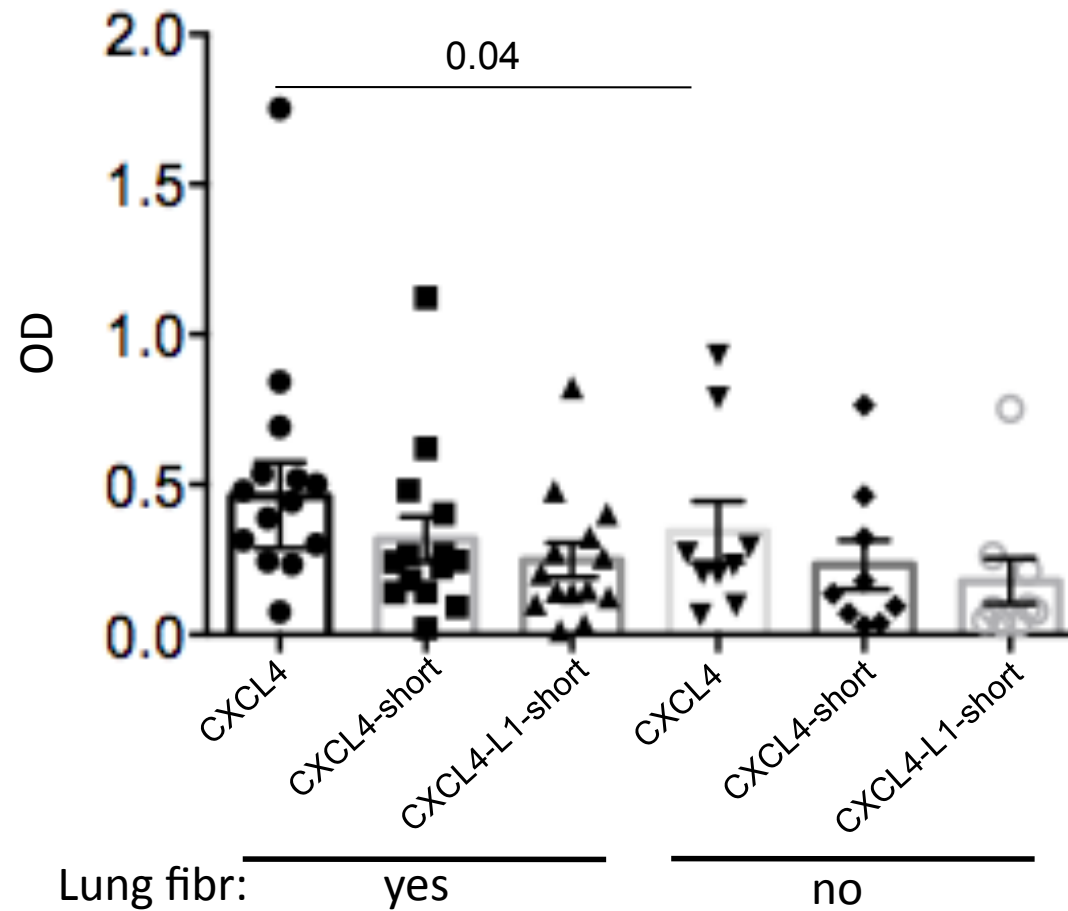

**Figure S2. LsSSc with lung fibrosis have higher anti-CXCL4 antibodies.** Patients with lung fibrosis and without lung fibrosis were tested for antibody reactivity to entire CXCL4 (CXCL4) or to the 27 mer peptides spanning the COOH-term of CXCL4 (CXCL4-short) or CXCL4-L1 (CXCL4-L1-short), by ELISA. Results are reported as optical density (OD). Horizontal bars represent the means, vertical bars are standard error of the mean (SEM), *p* values by Mann-Whitney test.

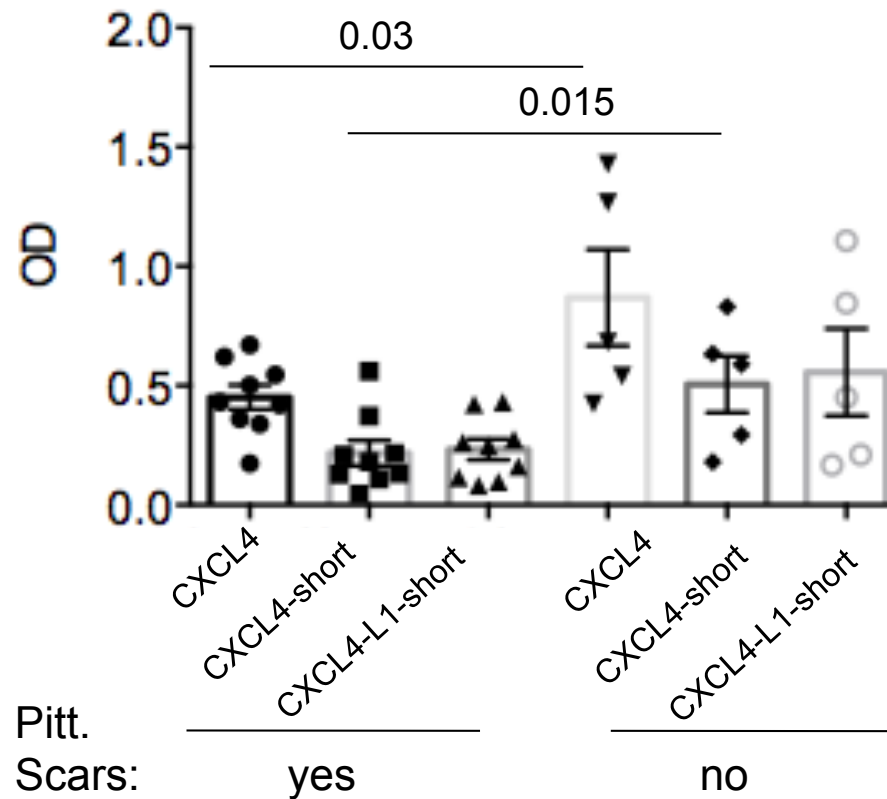

**Figure S3. EaSSc with pitting scars have lower anti-CXCL4 antibodies than patients without pitting scars.** Patients with pitting scars and without pitting scars were tested for antibody reactivity to entire CXCL4 (CXCL4) or to the 27 mer peptides spanning the COOH-term of CXCL4 (CXCL4-short) or CXCL4-L1 (CXCL4-L1-short), by ELISA. Results are reported as optical density (OD). Horizontal bars represent the means, vertical bars are standard error of the mean (SEM), *p* values by Mann-Whitney test.

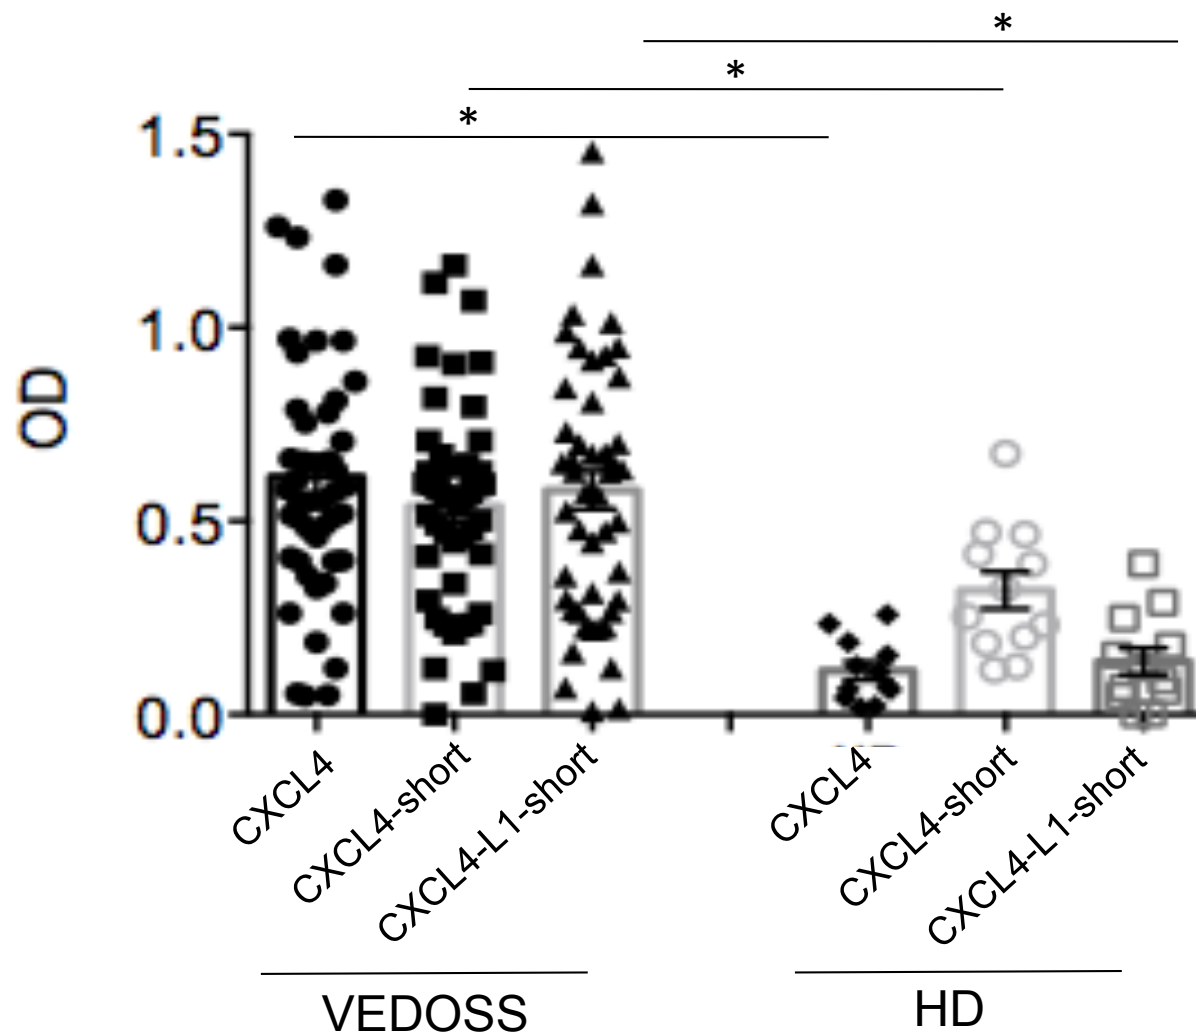

**Figure S4. Anti-CXCL4 antibodies are present in the VEDOSS replication cohort.** Sera of VEDOSS patients and HD were tested for antibody reactivity to entire CXCL4 (CXCL4) or to the 27mer peptides spanning the COOH-term of CXCL4 (CXCL4-short) or CXCL4-L1 (CXCL4-L1-short), by ELISA. Results are reported as optical density (OD). Horizontal bars represent the means, vertical bars are standare error of the mean (SEM), P values by Mann-Whitney test. \*  $p < 0.05$
